# Supplementary material
Source: Springer Nature journal article supplement (https://www.springermedizin.de/resource/supplementary/12916_2011_392_MOESM1_ESM.pdf/9599826)

# PERCENTAGE OF ENCOUNTERS

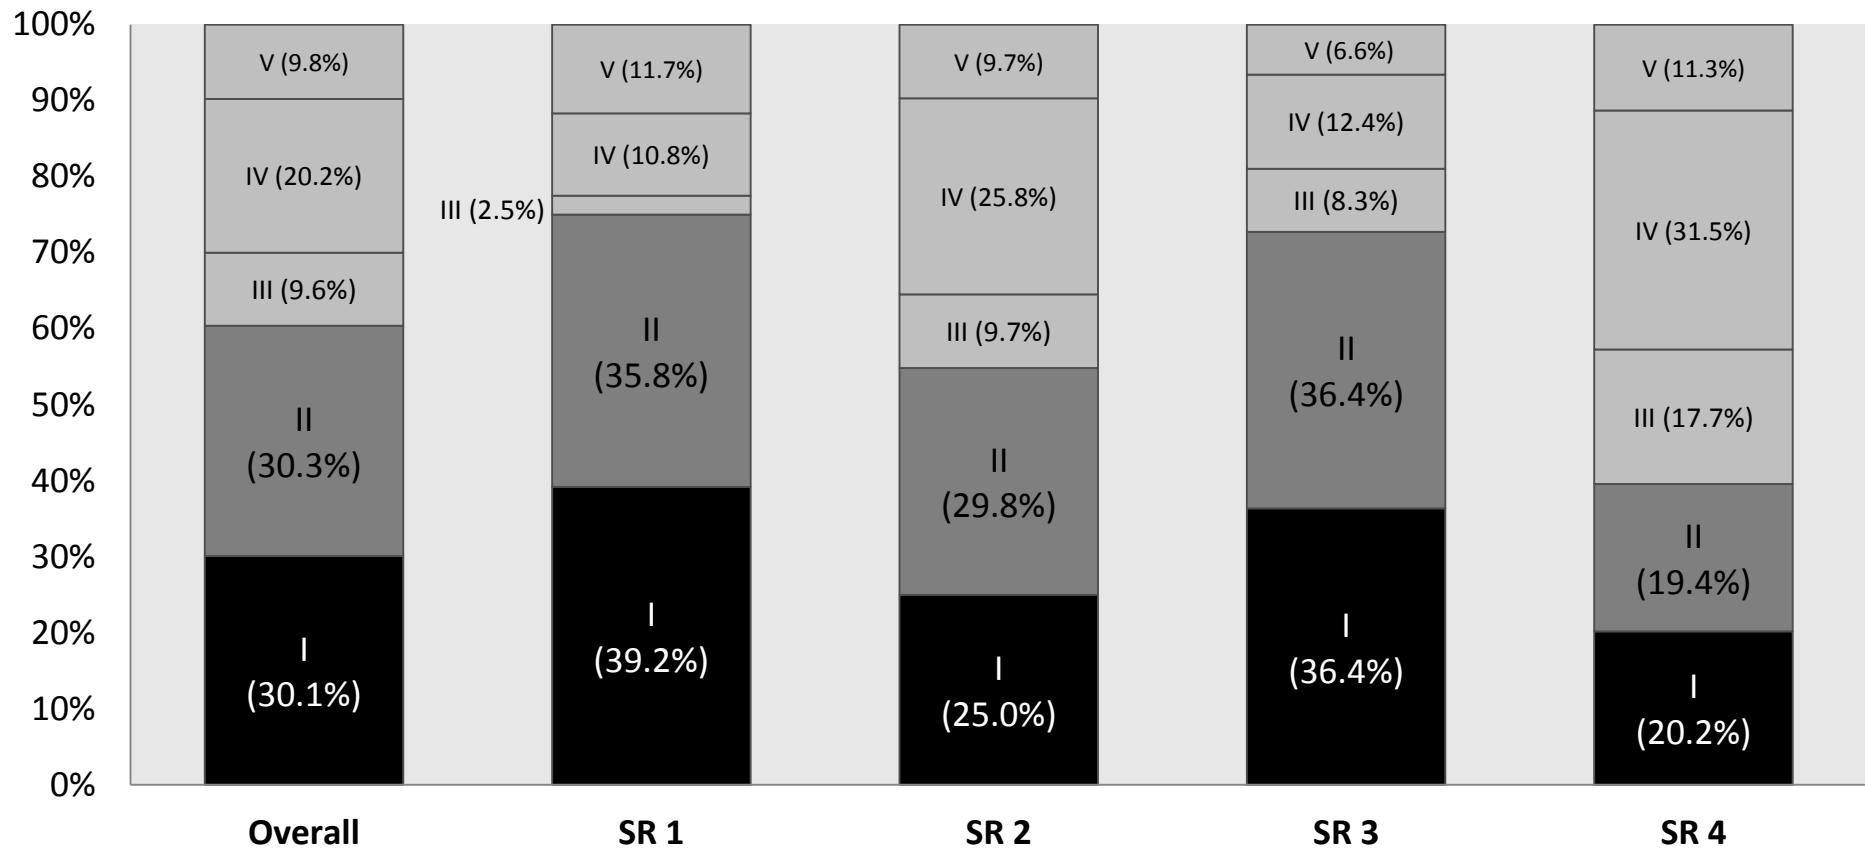

Supplement: MOESM1 [file 9599826]
